# Supplementary material
Source: Elsevier journal article supplement (https://www.sciencedirect.com/science/article/pii/S2529984020300501)
Supplement: mmc1 [file S2529984020300501:mmc1.docx]

**Material suplementario**

Tabla 3. Síntesis artículos incluidos en la revisión

| **Autores** | **Revista/**  **Clasificación*/**  **Año** | **País** | **Objetivo del estudio** | **Enfoque** | **Participantes** | **Instrumento** | **Resultados** |
| --- | --- | --- | --- | --- | --- | --- | --- |
| Koukouli S, Lambraki M, Sigala E, Alevizaki A, Stavropoulou A. | Intensive and Critical Care Nursing  (SJR: Q1), 2018 | Grecia | Explorar las experiencias, necesidades y estrategias de afrontamiento de familias de pacientes admitidos a unidades de cuidados intensivos adultos | Cualitativo. Descriptivo | Familiares | Entrevista | Debe promoverse e implementarse un marco inclusivo para la familia en cuidados intensivos reconociendo y apoyando el papel de la familia en la enfermedad y recuperación del paciente. |
| Chang PY, Wang HP, Chang TH, Yu JM, Lee SY. | Intensive and Critical Care Nursing  (SJR: Q1), 2018 | China | Explorar la asociación entre el estrés, los trastornos del sueño y el apoyo social entre cuidadores familiares primarios en unidades de cuidados intensivos durante el periodo inicial de hospitalización en la UCI | Cuantitativo. Transversal | Cuidadores familiares | Impact of Events Scale Revised General Sleep Distturbance Scale Lee Fatige Scale Norbeck Social Support Questionnaire | Se necesitan más intervenciones para ayudar a los cuidadores familiares primarios a lidiar con el estrés y mejorar los síntomas relacionados con el estrés |
| Breisinger L, Macci Bires A, Cline TW. | Critical Care Nursing Quarterly  (SJR: Q2), 2018 | USA | Disminuir los sentimientos de ansiedad en los miembros de la familia con cirugía pos cardíaca mediante el uso de un kit de herramientas de cirugía cardíaca. | Cuantitativo. Proyecto | Familiares | Inventario de Ansiedad de Rasgo del Estado (STAI) Formulario Y- 1 | La ansiedad familiar puede ser perjudicial tanto para el paciente como para la familia. La ansiedad inhibe al cerebro de tomar nueva información y puede crear una barrera con el equipo de atención médica. |
| Sak-Dankosky N, Andruszkiewicz P, Sherwood PR, Kvist T. | Intensive and Critical Care Nursing  (SJR: Q1), 2018 | Finlandia | Describir las preferencias de los familiares de los pacientes de cuidados intensivos con respecto a la idea de una reanimación cardiopulmonar observada por la familia como paciente internado | Cualitativo. Descriptivo | Familiares | Entrevista | Involucrar a la familia adecuadamente, ayudaría a apoyar mejor a los pacientes y satisfacer las necesidades de los familiares. |
| Kawarai-Lefor A, Ohnuma T, Nunomiya S, Yokota S, Makino J, Sanui M | Journal of Critical Care (SJR: Q1), 2018 | Japón | Evaluar el impacto de la vestimenta y el comportamiento del personal en las percepciones de la atención por parte de los visitantes de una UCI en Japón | Cuantitativo. Transversal | Visitantes de la UCI | Encuesta | Los familiares consideran que el personal de la unidad debe usar una etiqueta de nombre. La percepción general de los visitantes sobre la atención médica recibida se ve afectada por la vestimenta. |
| Cederwall CJ, Olausson S, Rose L, Naredi S, Ringdal M. | Intensive and Critical Care Nursing  (SJR: Q1), 2018 | Suecia | Identificar evidencias de barreras para la atención centrada en la persona durante el destete prolongado | Cualitativo. Descriptivo | Enfermeras | Entrevista | Las enfermeras informaron que durante el destete prolongado desarrollaron una relación más fuerte con aquellos familiares que visitaban diariamente. Esto genera confianza entre la enfermera y el familiar. |
| Padilla-Fortunatti C, Rojas-Silva N, Amthauer-Rojas M, Molina-Muñoz Y. | Enfermería Intensiva  (SJR: Q4), 2018 | Chile | Identificar las necesidades más importantes en familiares de pacientes hospitalizados en una UCI de un hospital universitario en Santiago, Chile. | Cuantitativo. Transversal | Familiares | Cuestionario Critical Care Family Needs Inventory | La mayor parte de las necesidades de los familiares se relacionan con la seguridad, la información, proximidad y apoyo. La mayoría de las necesidades estuvieron relacionadas con la comunicación |
| Alfheim HB, Rosseland LA, Hofsø K, Småstuen MC, Rustøen T. | Journal of Pain and Symptom Management (SJR: Q1), 2018 | Noruega | Describir la ocurrencia, severidad y angustia relacionada con síntomas múltiples de cuidadores familiares de paciente de UCI. | Cuantitativo. Transversal | Cuidadores familiares | Cuestionario autodiligenciable de evaluación de síntomas | El síntoma más recurrente fue "preocupante" y fue considerado como más severo y angustiante. |
| Velasco-Bueno JM, Alonso-Ovies A, Heras La Calle G, Zaforteza-Lallemand C. | Medicina Intensiva  (SJR: Q2), 2018 | España | Explorar las diferentes percepciones de las demandas informativas de las familias, los médicos y las enfermeras. | Cuantitativo. Transversal | Familiares, enfermeras y médicos | Cuestionario derivado de análisis de contenido | Las preguntas más importantes para las familias tienen que ver con el pronóstico y la gravedad, y la necesidad de recibir información. Se necesita comunicación y consenso entre médicos y enfermeras para proporcionar información coherente y completa. |
| Egerod I, Kaldan G, Coombs M, Mitchell M. | Intensive and Critical Care Nursing  (SJR: Q1), 2018 | Dinamarca | Investigar la prestación de cuidado de duelo y servicios de seguimiento para las familias en duelos en las UCI Danesas. | Cuantitativo. Transversal | Líderes de enfermería | Cuestionario computarizado auto administrado | Las partes de los servicios de duelo que percibieron como más apreciadas por la familia fueron reunirse con la enfermera y el médico, una llamada telefónica para responder cualquier pregunta, una revisión de la trayectoria de la enfermedad de su pariente y comprender que la muerte de su pariente era inevitable. |
| Shen HS, Chen SY, Cheung DST, Wang SY, Lee JJ, Lin CC. | Journal of Pain and Symptom Management (SJR: Q1), 2018 | China | Examinar y comparar las experiencias familiares del uso de Terapia de Sedación Paliativa en unidad de cuidado paliativo y UCI. | Cuantitativo. Transversal | Familiares | Family´s Concerns About PST | Los miembros de la familia de pacientes en la UCI experimentaron mayores niveles de duelo. |
| Thermaenius J, Schandl A, Sluys KP. | Intensive and Critical Care Nursing  (SJR: Q1), 2018 | Suecia | Desarrollar y llevar a cabo la validación de un cuestionario destinado a evaluar la satisfacción de las familias con respecto a la calidad de la atención en las UCIs suecas. | Cuantitativo. Validación de instrumento | Familiares | Swedish Family Satisfaction Intensive Care Questionnaire (SFS- ICQ) | La medición de la satisfacción familiar de la atención en unidades de cuidados intensivos ayuda a resaltar las áreas de atención que son de alta calidad y también las que necesitan mejoras. |
| Strachan PH, Kryworuchko J, Nouvet E, Downar J, You JJ. | Applied Nursing Research  (SJR: Q2), 2018 | Canadá | Examinar críticamente las percepciones de la enfermera y el médico sobre el papel de la enfermera en los objetivos de las discusiones de atención y la toma de decisiones con los pacientes que experimentan enfermedades graves y sus familias | Cualitativo. Descriptivo | Enfermeras, médicos y residentes | Entrevista. Técnica de incidente crítico de Flanagan | Las enfermeras dijeron que a menudo los pacientes o sus familias recurrían a ellos para aclarar y dar sentido a la información transmitida por un médico. A menudo reformularon y aclararon la información para reconocer y mitigar la angustia de la familia con respecto a la enfermedad y las posibles implicaciones de las decisiones. |
| Komachi MH, Kamibeppu K. | Mental Health and Prevention (SJR: Q3), 2018 | Japón | Determinar el nivel de resiliencia en los miembros de la familia de los pacientes ingresados en la UCI | Cuantitativo. Transversal | Familiares | Impact of Event Scale-Revised (IES-R) and the Connor-Davidson Resilience Scale (CD-RISC) | La resiliencia reduce la ocurrencia de estrés postraumático. Por lo tanto, es esencial desarrollar sistemas de apoyo para ayudar a los miembros de la familia de pacientes críticamente enfermos y para aumentar su resiliencia. |
| Hetland B, McAndrew N, Perazzo J, Hickman R. | Intensive and Critical Care Nursing  (SJR: Q1), 2018 | USA | Explorar los enfoques de las enfermeras para incorporar a los cuidadores familiares en la atención de los pacientes en la UCI | Cualitativo. Análisis de contenido | Enfermeras | Encuesta electrónica | Tanto la enfermera, el paciente y la familia como el ambiente y los recursos disponibles para el cuidado familiar tienen el potencial de servir como barreras o facilitadores para la participación del cuidador familiar en el cuidado del paciente. |
| Hanne B. Alfheim, Rosseland, Hofsø, Småstuen, & Rustøen | Intensive and Critical Care Nursing  (SJR: Q1), 2018 | Noruega | Describir la prevalencia y la evaluación de los síntomas de estrés postraumático en cuidadores familiares durante el primer año del ingreso de un paciente a la UCI | Cuantitativo. Longitudinal | Familiares | Comorbidity Questionnaire (SCQ), Event Scale Revised (IES- R), Hearth Hope Index | Es importante dirigir la información sobre los síntomas potenciales de estrés postraumático Un enfoque de atención centrada en la familia en la UCI puede ayudar a identificar grupos vulnerables de cuidadores primarios. |
| Ayuso-Murillo D, Colomer-Sánchez A, Herrera-Peco I. | Enfermería Intensiva  (SJR: Q4), 2017 | España | Analizar los rasgos de personalidad asociados a las habilidades sociales, enfocadas a la comunicación con otras personas, pacientes y familiares, de las enfermeras que trabajan en UCI de adultos y compararlas con las enfermeras que trabajan en unidades asistenciales de hospitalización general | Cuantitativo. Transversal | Enfermeras | Cuestionario 16 PF- 5: Factores de personalidad | Propone realizar actividades de intervención y formación específica para desarrollar habilidades sociales en las enfermeras de la UCI. |
| Rojas-Silva N, Padilla-Fortunatti C, Molina-Muñoz Y, Amthauer-Rojas M. | Intensive and Critical Care Nursing  (SJR: Q1), 2017 | Chile | Adaptar culturalmente y validar el Inventario de necesidades familiares de cuidados críticos en una muestra de familiares chilenos de pacientes de cuidados intensivos | Cuantitativo. Validación de instrumento | Familiares y enfermeras | Inventario de necesidades familiares de cuidados críticos | Conocer las necesidades de los miembros de la familia de UCI representa una oportunidad para que los equipos de salud mejoren la calidad al obtener una visión integrada de la atención del paciente, que debe incluir y valorar las experiencias vividas por la familia. |
| De Beer J, Brysiewicz P. | Health SA Gesondheid (SJR: Q4), 2017 | South África | Explorar y describir la conceptualización de la atención familiar durante una enfermedad crítica en Kwa-Zulu-Natal. | Cualitativo. Teoría fundamentada | Familiares, enfermeras y médicos | Entrevista | Las familias no solo proporcionan un soporte vital a su ser querido, sino que también se convierten en la "voz" del paciente. De manera similar, los familiares deben trabajar en colaboración y en solidaridad con el personal de salud para lograr el mejor resultado posible de la enfermedad crítica. |
| Koulouras V, Konstanti Z, Lepida D, Papathanakos G, Gouva M. | Intensive and Critical Care Nursing  (SJR: Q1), 2017 | Grecia | Describir las experiencias de vergüenza interna y externa de los miembros de la familia de los pacientes de la UCI | Cuantitativo. Transversal | Familiares | Experinece of Shame Scale (ESS) The Other Shamer Scale (OAS) | Los que vivieron con el paciente experimentaron la carga y el estrés del cuidado y reflejan su lucha para hacer frente a sus factores de estrés. |
| Asencio-Gutiérrez JM, Reguera-Burgos I. | Enfermería Intensiva  (SJR: Q3), 2017 | España | Conocer la opinión de los profesionales sanitarios de Urgencias/Emergencias y Cuidados Críticos sobre la presencia familiar durante las maniobras de RCP | Cuantitativo. Transversal | Enfermeras y médicos | Encuesta online autoadminitrada | Beneficios potenciales para la atención: la mejora de la comunicación sanitario-familia, la oportunidad de los allegados de no quedarse con dudas sobre si se hizo todo lo posible y la participación de estos en el proceso. |
| Kozub E, Scheler S, Necoechea G, O’Byrne N. | Critical Care Nursing Quarterly  (SJR: Q2), 2017 | USA | Aumentar la satisfacción de las enfermeras en relación con PFCC (cuidado centrado en la familia y el paciente) | Cuantitativo. Proyecto | Enfermeras | Desarrollo de pautas. Encuestas de implementación y post implementación | Ampliar las horas de visita a la UCI y monitorear cómo se las opera es una estrategia fundamental para aumentar la participación de la familia en el cuidado de pacientes críticamente enfermos. |
| Hutchinson AL, Van Wissen KA. | Intensive and Critical Care Nursing  (SJR: Q1), 2017 | Nueva Zelanda | Obtener una idea de la experiencia de la familia cuando un paciente de la UCI adulta se va a su casa a morir | Cualitativo. Descriptivo | Familiares | Entrevista | Los desafíos para la familia incluyen: el estrés y la emoción de tener un ser querido críticamente enfermo en la UCI, la sensación de que todo sucede rápidamente y las presiones asociadas y las incógnitas. La colaboración entre el personal y la familia es necesaria para lograr el objetivo común de una manera segura y solidaria. |
| Mitchell ML, Aitken LM. | Australian Critical Care (SJR: Q1), 2017 | Australia | Comprender el impacto de las visitas flexibles desde el punto de vista de las partes interesadas: pacientes, familiares y personal de la UCI | Mixto. Transversal- Descriptivo | Familiares, pacientes y personal | Familia: FS- ICU Pacientes: entrevista Personal: Encuesta y grupos focales | Las necesidades de los pacientes siguen siendo primordiales pero cada oportunidad para incluir a la familia debería ser tomada como que tiene el potencial para mejorar la comunicación. |
| Au SS, Roze des Ordons A, Soo A, Guienguere S, Stelfox HT. | Journal of Critical Care (SJR: Q1), 2017 | Canadá | Describir las experiencias, preferencias y percepciones de la participación de la familia en rondas de UCI desde las perspectivas de las familias de pacientes de la UCI y los proveedores de atención médica | Cuantitativo. Transversal | Familiares y personal | Encuesta | La mayoría de los proveedores informaron que las familias de los pacientes deben tener la opción de asistir a las rondas diarias y se sintieron cómodas con la participación familiar en rondas. |
| Padilla-Fortunatti C, Rojas-Silva N | Australian Critical Care (SJR: Q1), 2017 | Chile | Explorar las características de los estudios que utilizaron cuestionarios para medir la satisfacción de los miembros de la familia de pacientes de la UCI | Revisión de la literatura. Revisión narrativa | Familiares | Bases de datos: PubMed, CINAHL, ProQuest Nursing, ProQuest Social Science, ProQuest Psychology, Science Direct, PsycINFO, LILACS y Scielo. | La diversidad del cuestionario, la falta de procesos formales de validación, las bajas tasas de respuesta y la variabilidad en el momento en que se mide la satisfacción familiar son aspectos que limitan la satisfacción de los miembros de la familia de los pacientes en la UCI. |
| Toro-Flores R, López-González R, López-Muñoz JA. | Enfermería Intensiva  (SJR: Q4), 2017 | España | Explorar los conocimientos y las actitudes del paciente crítico y de sus familiares respecto a las instrucciones previas y conocer la forma de participar la familia en la toma de decisiones al final de la vida. | Revisión de la literatura. Revisión narrativa | Familiares y pacientes | Bases de datos: LILACS, EMBASE, Bibliotheca Cochrane Plus, Science-Direct, IME, MEDES y CUIDEN | Como factores facilitadores de la participación de la familia en la toma de decisiones se encuentran el haber mantenido conversaciones entre familiares y pacientes y la existencia de buena comunicación de los representantes y el equipo sanitario que atiende al enfermo. |
| Noome M, Dijkstra BM, van Leeuwen E, Vloet LCM. | Intensive and Critical Care Nursing  (SJR: Q1), 2016 | Holanda | Examinar la experiencia de la familia con la enfermería en aspectos de la atención al final de la vida en la Unidad de Cuidados Intensivos después de una decisión de poner fin al sostenimiento y tratamiento de la vida | Cualitativo. Fenomenología | Familiares | Entrevista | La familia experimentó una comunicación problemática entre las enfermeras de la UCI y otros profesionales en relación con el proceso de toma de decisiones. La familia apreció la posibilidad de realizar sus propios rituales durante el proceso de muerte del paciente. |
| Bautista- Rodríguez LM, Arias- Velandia MF, Carreño- Leiva ZO. | Revista Cuidarte (Indexada Publindex- Colombia: C), 2016 | Colombia | Evaluar la percepción que tiene el familiar del paciente crítico respecto a la comunicación verbal y no verbal, y el apoyo emocional brindado por el personal de enfermería durante la hospitalización en la unidad de cuidados intensivos de una clínica de IV nivel | Cuantitativo. Transversal | Familiares | Percepción de los Familiares de los Pacientes Críticos | El profesional de enfermería, al mostrar empatía, trato cordial, compañía y explicación en la realización de los procedimientos, confianza, tranquilidad, y escucha activa, permite que la familia las perciba como un cuidado con calidad. |
| Parrado-Lozano YM, Sáenz-Montoya X, Soto-Lesmes VI, Guáqueta-Parada SR, Amaya-Rey P, Caro-Castillo CV, et al. | Investigación en Enfermería: Imagen y Desarrollo (Indexada Publindex- Colombia: C), 2016 | Colombia | Construcción, refinación y validación facial y de contenido de dos instrumentos para medir la relación interpersonal enfermera-familia o acudiente, y enfermera-paciente adulto en la UCI. | Cuantitativo. Validación de instrumento | Familiares y enfermeras | Diseño por fases- definición de constructo- definición operacional- construcción de os ítems- validación de los instrumentos | Se mejorar la dimensión de estrategias comunicativas, entendida esta como la capacidad de la enfermera de incluir diferentes maneras de transmitir y recibir mensajes en un ambiente particular de interacción con el paciente, donde ella debe interpretar las manifestaciones de dolor, la interferencia en la comunicación y las necesidades básicas. |
| Mitchell ML, Coyer F, Kean S, Stone R, Murfield J, Dwan T | Australian Critical Care (SJR: Q1), 2016 | Australia | Extender el conocimiento y comprensión de la evidencia empírica de intervenciones de cuidado centrado en el paciente y la familia (PFCC) dentro de la UCI adulto en lo que respecta al impacto sobre los pacientes o familiares en la UCI | Revisión de la literatura. Revisión narrativa | Familiares | Bases de datos: Medline, CINHAL, PsycINFO, Cochrane Library, Web of Science | Para que la enfermera individualice con éxito la atención de calidad del paciente, es imperativo un compromiso y la promulgación de asociaciones entre profesionales de la salud, pacientes y familiares. |
| Walker W, Deacon K. | Intensive and Critical Care Nursing  (SJR: Q1), 2016 | Inglaterra | Explorar las intervenciones de enfermería para el cuidado del duelo centrado en la persona en entornos de cuidados intensivos y cuidados intensivos | Cualitativo. Descriptivo | Enfermeras | Entrevista | A la familia le gustaría escuchar a la enfermera con la que habían establecido una terapia, aunque en la práctica, un médico parecía ser el principal comunicador. |
| Ranse K, Bloomer M, Coombs M, Endacott R. | Australian Critical Care (SJR: Q1), 2016 | Nueva Zelanda | Identificar la información que las enfermeras de cuidados intensivos brindan con más frecuencia a las familias en preparación y durante el retiro del tratamiento para mantener la vida. | Cuantitativo. Transversal | Familiares | Encuesta | La provisión de información durante la atención al final de la vida refleja un enfoque de atención centrada en la familia por parte de las enfermeras de cuidados críticos, con información relacionada con el cuidado emocional y el apoyo de la familia. |
| Kisorio LC, Langley GC. | Intensive and Critical Care Nursing  (SJR: Q1), 2016 | South África | Obtener experiencias de los miembros de la familia de la atención al final de la vida en unidades de cuidados intensivos para adultos | Cualitativo. Descriptivo | Familiares | Entrevista | La mayoría de las familias no estaban contentas con el cuidado que recibieron mientras sus familiares estaban en la UCI. |
| Sánchez-Vallejo A, Fernández D, Pérez-Gutiérrez A, Fernández-Fernández M. | Medicina Intensiva  (SJR: Q2), 2016 | España | Describir las necesidades de la familia del paciente ingresado en la UCI y la opinión de sus profesionales sobre aspectos relativos a la presencia familiar en la unidad | Cuantitativo. Prospectivo | Familiares y personal | Cuestionarios auto administrados sobre: Percepciones de los familiares del paciente ingresado en la UCI a estudio y las opiniones de los profesionales sanitarios de la UCI | La información fue adecuada, resultando insuficiente en cuanto a los cuidados de enfermería. Los profesionales reclamaron formación en habilidades de comunicación. |
| Eggenberger SK, Sanders M. | Australian Critical Care (SJR: Q1), 2016 | USA | Examinar la influencia de una intervención educativa sobre las actitudes de las enfermeras hacia la atención familiar y la confianza en ellas, así como las percepciones de las familias sobre el apoyo de las enfermeras en un entorno de cuidados críticos para adultos. | Mixto. Transversal- Descriptivo | Familiares y enfermeras | Family Nurse Practice Scale (FNPS) Iceland Family Perceived Support Questionnaire (ICE- FQSQ) Grupos focales | Compartir historias entre familias y enfermeras incrementa la comprensión de la experiencia de a la familia con la enfermedad crítica para dirigirse hacia la implementación de prácticas de cuidado centradas en la familia. |
| Frivold G, Slettebø Å, Dale B. | Journal of Clinical Nursing (SJR: Q1), 2016 | Noruega | Describir las experiencias de la vida cotidiana de familiares después de una la estancia de un ser amado en una Unidad de Cuidados Intensivo. | Cualitativo. Fenomenología | Familiares | Entrevista | No hubo una persona que se encargara de reconocer las necesidades de información de los familiares que pudieran explicar la situación y de los posibles resultados para lograr una mayor comprensión. |
| Kohi TW, Obogo MW, Mselle LT. | BMC Nursing (SJR: Q1), 2016 | Tanzania | Explorar las necesidades percibidas y el nivel de satisfacción de los miembros de familias de paciente críticamente enfermeros | Cuantitativo. Transversal | Familiares | Cuestionario semiestructurado sobre la percepción de necesidad y satisfacción con el cuidado | Una de las principales necesidades de los familiares fue que el personal tuviera consciencia de la tristeza que siente el familiar. |
| Chapman DH, Collingridge DS, Mitchell LA, Wright ES, Hopkins RO, Butler JM | American Journal of Critical Care (SJR: Q1), 2016 | USA | Determinar si una transición desde una visita restringida a una sin restricción mejora la satisfacción de miembros de la familia de pacientes y si tal transición afecta la satisfacción de enfermeras y la percepción de enfermeras de la satisfacción entre las familias de los pacientes | Cuantitativo. Prospectivo | Familiares y enfermeras | Questionnaires Measuring Satisfaction With Old and New Visitation Policies | Las horas sin restricción mejoraron la satisfacción de los familiares al igual que mejoró la percepción de las enfermeras de los familiares. La satisfacción de las enfermeras no cambio. |
| Montoya-Tamayo D., Monsalve-Ospina T., Forero-Pulido C. | Enfermería intensiva  (SJR: Q4), 2015 | Colombia | Conocer las experiencias y el significado que le dan las enfermeras al afrontamiento familiar, durante la hospitalización del paciente adulto en las unidades de cuidados intensivos | Cualitativo. Fenomenología | Enfermeras | Entrevista | Las enfermeras pueden favorecer el afrontamiento de las familias mediante la información que brindan, el apoyo interdisciplinario, las visitas y el acompañamiento que brinden. |
| Peden-McAlpine C, Liaschenko J, Traudt T, Gilmore-Szott E. | International Journal of Nursing Studies (SJR: Q1), 2015 | USA | Documentar como las enfermeras de la UCI que proveen comodidad a los paciente moribundos describen sus comunicaciones con las familias para negociar un consenso sobre la retirada de tratamiento y el desplazamiento hacía cuidados paliativos. | Cualitativo. Descriptivo | Enfermeras | Entrevista | Una buena comunicación mejora el cuidado del paciente y la familia al final de la vida. |
| Akroute AR, Bondas T. | Intensive and Critical Care Nursing  (SJR: Q1), 2015 | Noruega | Explorar la experiencias de enfermeras de cuidado critico en relación a los familiares de pacientes mayores de 80 años o más admitidos en UCI | Cualitativo. Fenomenología | Enfermeras | Entrevista | Se presentan algunas barreras en la comunicación como la mala interpretación por parte de los familiares de la información que se les brinda y el estrés que dificultad la capacidad de comprender dicha información. |
| Wong P, Liamputtong P, Koch S, Rawson H. | Intensive and Critical Care Nursing  (SJR: Q1), 2015 | Australia | Presentar los resultados de un estudio más ampliar sobre explorar la experiencia de las familias de los pacientes críticamente enfermos y sus interacciones con el personal, su medio ambiente, el paciente y otras familias cuando su familiar es admitido en una unidad de cuidados intensivos de Australia. | Cualitativo. Teoría fundamentada | Familiares | Entrevista | Facilitar la comunicación interactuando en formas de apoyo a través de la tranquilidad y ser receptivos a las señales de las familias puede ayudar a aliviar la ansiedad y la angustia experimentada por las familias de los enfermos críticos. |
| Frivold G, Dale B, Ashild S. | Intensive and Critical Care Nursing  (SJR: Q1), 2015 | Noruega | Iluminar el significado de ser atendido por enfermeras y médicos para los familiares en las unidades de cuidados intensivos de Noruega | Cualitativo. Fenomenología | Familiares | Entrevista | Satisfacer las necesidades durante una estancia en la UCI como familiar puede generar sentimientos de gratitud y confianza en el sistema de salud a pesar de los recuerdos traumáticos o la pérdida de seres queridos. |
| Aliberch-Raurell AM, Miquel-Aymar IM. | Enfermería Intensiva  (SJR: Q4), 2015 | España | Conocer el estado actual y la evolución del rol de las familias en la unidad de cuidados intensivos y reflexionar sobre puntos de mejora y conocer el papel de enfermería. | Revisión de la literatura. Revisión narrativa | Familiares | PubMed, Science Direct, Web of Knowledge, Cuiden y Cinahl | El aumento de contacto entre la enfermera y los familiares aporta confianza y seguridad a las familias y contribuye a una mejor adaptación a la nueva situación. |
| Holanda-Peña MS, Ots-Ruiz E, Domínguez-Artiga MJ, García-Miguelez A, Ruiz-Ruiz A, Castellanos-Ortega A, et al. | Medicina Intensiva  (SJR: Q2), 2015 | España | Conocer el grado de satisfacción de los familiares de los pacientes dados de alta de la UCI y el del propio paciente. | Cuantitativo. Transversal | Familiares y pacientes | Encuesta Family Satisfaction Intensive Care Unit (FS- ICU) | Existen varios puntos a mejorar como, el ambiente de la sala de espera y el ambiente propio de la UCI en cuanto a ruido, intimidad e iluminación se refiere, así como algunos aspectos del proceso de toma de decisiones, entre ellos la esperanza suministrada acerca de la recuperación de su familiar. |
| Hekmatpou D, Ebrahimi-Fakhar HR. | The Journal of Nursing Research  (SJR: Q2), 2015 | Irán | Explorar las necesidades percibidas de las familias de pacientes hospitalizados en unidades de cuidados críticos en la ciudad de Arak, Irán. | Cualitativo. Análisis de contenido | Familiares | Entrevista | Las enfermeras deben hablar más con los familiares para alentarlos a expresar sus sentimientos y emociones. Fortalecer la capacidad para interactuar de manera positiva y apoyar a su paciente crítico promueve la confianza en la relación con la enfermera. |
| Kourti M, Christofilou E, Kallergis G. | Avances en Enfermería (Indexada Publindex- Colombia: C), 2015 | Grecia | Investigar los síntomas de ansiedad y depresión en familiares de pacientes que fueron admitidos en la Unidad de Cuidados Intensivos | Cuantitativo. Transversal | Familiares | Hospital Anxiety and Depresión Scale (HADS) | Los síntomas depresivos están asociados con dificultades en el sueño, pérdida de peso, reducción de energía y dificultades para pensar y concentrarse. Las enfermeras deben reconocer estos síntomas e intervenir sobre ellos. |
| Hajj M, Gulgulian T, Haydar L, Saab A, Dirany F, Badr LK. | Nursing in Critical Care (SJR: Q2), 2015 | Líbano | Evaluar la satisfacción de los familiares con el cuidado de sus seres amados en unidades de cuidado intensivo en un centro médico universitario en Libado | Cuantitativo. Transversal | Familiares | Critical Care Family Needs Inventory (CCFNI) | La evaluación de la satisfacción familiar en diferentes culturas es importante ya que cada cultura tiene necesidades específicas que son esenciales para descifrar. |
| Schubart JR, Wojnar M, Dillard JP, Meczkowski E, Kanaskie ML, Blackall GF, et al. | Intensive and Critical Care Nursing  (SJR: Q1), 2015 | USA | Comprender las percepciones de falta de comunicación y las circunstancias en que se presentan. | Cualitativo. Descriptivo | Personal | Entrevista | Entender que la comunicación inadecuada en la UCI no es un problema único, sino varios problemas distintos, es importante para guiar intervenciones efectivas. |
| Mosleh S, Alja’afreh M, Lee AJ. | Intensive and Critical Care Nursing  (SJR: Q1), 2015 | Jordania | Evaluar la validez de los miembros de la familia / amigos como representantes mediante la comparación de las percepciones de satisfacción con la atención y la toma de decisiones entre los pacientes críticos y sus familiares / amigos | Cuantitativo. Transversal | Familiares | Encuesta Family Satisfaction Intensive Care Unit (FS- ICU) | Las opiniones de familiares y amigos pueden servir como un proxy para evaluar el cuidado y los procesos de toma de decisiones de los pacientes en estado crítico. |
| Wilson ME, Kaur S, Gallo De Moraes A, Pickering BW, Gajic O, Herasevich V. | Journal of Critical Care (SJR: Q1), 2015 | USA | Identificar la información importante para los miembros de la familia para conocer rutinariamente sobre los pacientes de la UCI de los médicos. | Cualitativo. Descriptivo | Familiares y personal | Entrevista | Los temas importantes para las familias sobre el paciente incluyen el diagnóstico, los tratamientos, el pronóstico, el estado clínico, el cronograma, la comodidad, las metas de la atención, el equipo médico y la participación de la familia. |
| De Havenon A, Petersen C, Tanana M, Wold J, Hoesch R. | Journal of Critical Care (SJR: Q1), 2015 | USA | Evaluar si la hipótesis de que el discurso mejorado en las reuniones audiovisuales da lugar a decisiones más sólidas sobre la atención del paciente. | Cuantitativo. Prospectivo | Familiares | Encuesta | Las familias y los suplentes luchan con una multitud de decisiones difíciles cuando un ser querido está en la UCI, lo que puede llevar a la ansiedad, la depresión y el dolor abrumador. |
| Bernal-Ruiz D, Horta-Buitrago S. | Enfermería Universitaria (Indexada-Latindex), 2014 | Colombia | Elaborar una propuesta de gestión que permita desde la teoría brindar cuidado de calidad y excelencia a la familia de los pacientes en cuidado crítico. | Cuantitativo. Proyecto | Familiares | Revisión teórica | La interacción familia-enfermera es clave para propiciar una atención integral, evitar efectos psicológicos adversos y generar entornos terapéuticos humanizados carentes de connotación negativa. |
| Ayllón-Garrido N, Montero-Rus P, Acebes-Fernández MI, Sánchez-Zugazua J. | Enfermería Intensiva  (SJR: Q4), 2014 | España | Conocer la perspectiva de los profesionales respecto a los efectos de la visita abierta en el paciente, en la familia y en la actividad profesional | Cuantitativo. Transversal | Personal | Encuesta | Los profesionales siguen considerando la política de visitas restrictivas como la opción más idónea. No obstante, aceptan ampliar los horarios en ciertos casos, si se considera beneficioso para el paciente. |
| Martos-Casado G, Aragón-López A, Gutiérrez-Ramos N. | Enfermería Intensiva  (SJR: Q4), 2014 | España | Estimar la satisfacción de familiares de pacientes críticos con respecto al entorno asistencial, la relación con los profesionales y el régimen de visitas, y compararla con la percepción de los profesionales | Cuantitativo. Transversal | Familiares y personal | Encuesta | Es necesario motivar a las instituciones para formar a los profesionales en el tema de relación de ayuda, comunicación, afrontamiento de situaciones críticas y la creación de equipos específicos de apoyo emocional a pacientes, familiares y profesionales. |
| Galvis-López CR, Salamanca-Ramos E. | Investigación en Enfermería: Imagen Desarrollo (Indexada Publindex- Colombia: C), 2014 | Colombia | Describir las necesidades del cuidador familiar de pacientes adultos crónicos hospitalizados en UCI en una institución prestadora de salud privada en Villavicencio, Colombia | Cuantitativo. Transversal | Familiares | Critical care family Needs inventoy | La necesidades más importantes para los familiares son: seguridad, información, proximidad, apoyo y confort. |
| Murillo-Pérez MA, López-López C, Torrente-Vela S, Morales-Sánchez C, Orejana-Martín M, García-Iglesias M, et al.. | Enfermería Intensiva  (SJR: Q4), 2014 | España | Analizar la percepción de las enfermeras sobre el proceso de comunicación con los familiares de los pacientes adultos ingresados en un servicio de medicina intensiva (SMI). | Cuantitativo. Transversal | Enfermeras | Cuestionario Nurse Activities of Communicating with families (NACF) | La actividad de comunicación de las enfermeras es independiente de la experiencia en UCI, encontrando diferencias en los aspectos de información. |
| Kodali S, Stametz RA, Bengier AC, Clarke DN, Layon AJ, Darer JD. | Journal of Critical Care (SJR: Q1), 2014 | USA | Examinar si los miembros de la familia que informaron que se realizó una conferencia familiar tuvieron mayor satisfacción que aquellos que no informaron que se realizó una conferencia. | Cuantitativo. Retrospectivo | Familiares | The Family Satisfaction in the Intensive Care Unit Questionnaire 24 (FS-ICU24) | Las familias que informan que asisten a conferencias familiares están más satisfechas con la toma de decisiones en la UCI. Se destaca la necesidad de aumentar la comunicación en las UCI. |
| Adams JA, Anderson RA, Docherty SL, Tulsky JA, Steinhauser KE, Bailey DE | Heart & Lung (SJR: Q2), 2014 | USA | Explorar como los miembros de la familia de los pacientes de UCI en alto riesgo de morir responde a las estrategias de comunicación de enfermería. | Cualitativo. Descriptivo | Familiares | Entrevista | El conocimiento establece una base para las intervenciones dirigidas a las áreas importantes para los miembros de la familia y más probabilidades de mejorar su capacidad de tomar decisiones y de su bienestar. |
| Padilla-Fortunatti CF. | Investigación y Educación en Enfermería  (SJR: Q3), 2014 | Chile | Identificar las necesidades más importantes para los miembros de las familias de pacientes críticos adulto como se describe la literatura en las dimensiones establecidas en el inventario de necesidades familiares de cuidado crítico | Revisión de la literatura. Revisión narrativa | Familiares | PubMed, CINAHL, ProQuest Nursing & Allied Health Source, ProQuest Psychology Journal, LILACS, Science Direct, Ovid SP, PsycINFO, and Scielo. | La esperanza en la familia y la comunicación sincera con la persona sanitaria resultó ser las necesidades más relevantes. Las familias determinan que las enfermeras son los profesionales más adecuados para conocer y satisface las necesidades de las familias de los pacientes críticos |
| Gerasimou-Angelidi S, Myrianthefs P, Chovas A, Baltopoulos G, Komnos A. | Journal of Nursing Management (SJR: Q1), 2014 | Grecia | Estudiar la satisfacción familiar con el cuidado en una UCI y su asociación con la carga de trabajo de enfermería estimado por el Score de Actividades de Enfermería | Cuantitativo. Transversal | Familiares | Family Satisfaction ICU (FS ICU-24) Nursing Activities Score (NAS) Simplified Acute Physiology Score II (SAPS- II) | Se deben plantear la forma de que la familia tenga una participación exitosa en la toma de decisiones. |
| Nolen KB, Warren NA. | Critical Care Nursing Quarterly (SJR:Q2), 2017 | USA | Explorar e identificar las percepciones de las necesidades y determinar si esas necesidades fueron percibidas como atendidas o no satisfechas por los familiares de los pacientes alojados en las UCI. | Mixto. Descriptivo y transversal | Familiares | Needs Met Inventory (NMI)  Entrevista | Si se cuida a la familia, pueden cuidar mejor a sus seres queridos enfermos y estar más disponibles para el personal de enfermería, dando como resultado una base más sólida para la enfermera y la familia, que puede aliviar el estrés en ambos lados. |

Fuente: Elaboración propia

SJR: SCImago Journal Rank
